# Supplementary material for: Graphene quantum dots decorated with Fe3O4 nanoparticles/functionalized multiwalled carbon nanotubes as a new sensing platform for electrochemical determination of l-DOPA in agricultural products
Source: Royal Society of Chemistry journal article supplement (doi:10.1039/c6ay00836d), 2016-01-01
Supplement: c6ay00836d1.pdf [file c6ay00836d1.pdf]

**Graphene quantum dots decorated with Fe<sub>3</sub>O<sub>4</sub>  
nanoparticles/functionalized multiwalled carbon nanotubes  
as a new sensing platform for electrochemical determination  
of L-DOPA in agricultural products**

**Majid Arvand\*, Samaneh Abbasnejad, Navid Ghodsi**

*Electroanalytical Chemistry Laboratory, Faculty of Science, University of Guilan, Namjoo*

*Street, P.O. Box: 1914, Rasht, Iran*

\*Corresponding author. Tel.: +98 13 33320912, fax: +98 13 33333262

*E-mail address:* [arvand@guilan.ac.ir](mailto:arvand@guilan.ac.ir) (M. Arvand)

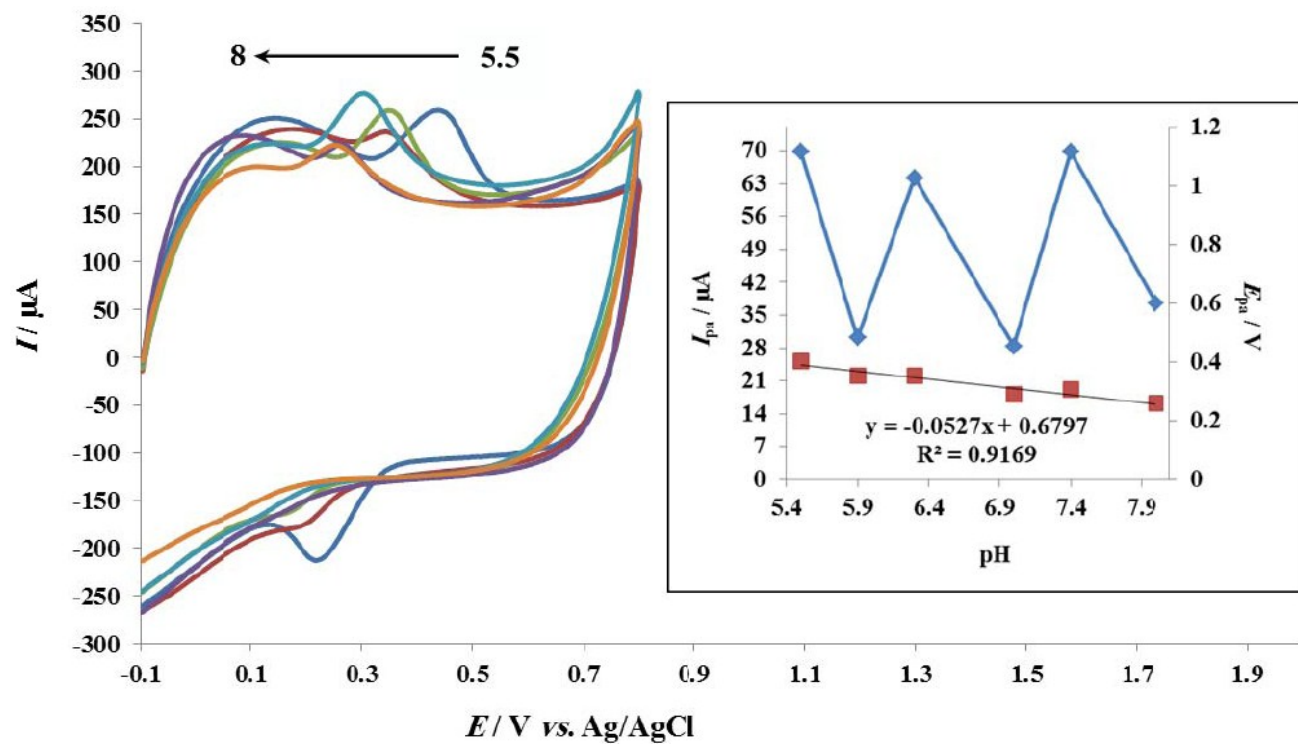

**Fig. S1.** Cyclic voltammograms of 0.1 mmol L<sup>-1</sup> L-DOPA on the surface of Fe<sub>3</sub>O<sub>4</sub>@GQDs/f-MWCNTs/GCE at different pH values (5.5, 5.9, 6.3, 7.0, 7.4, 8).

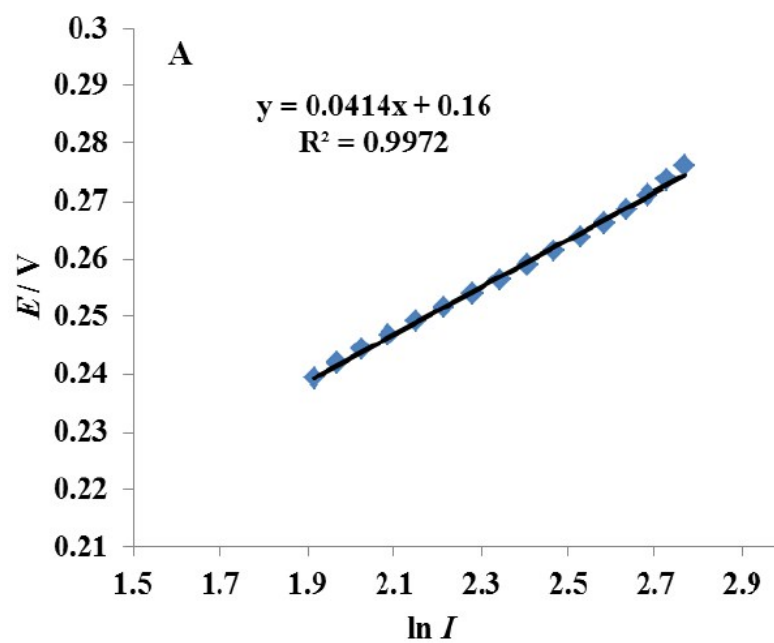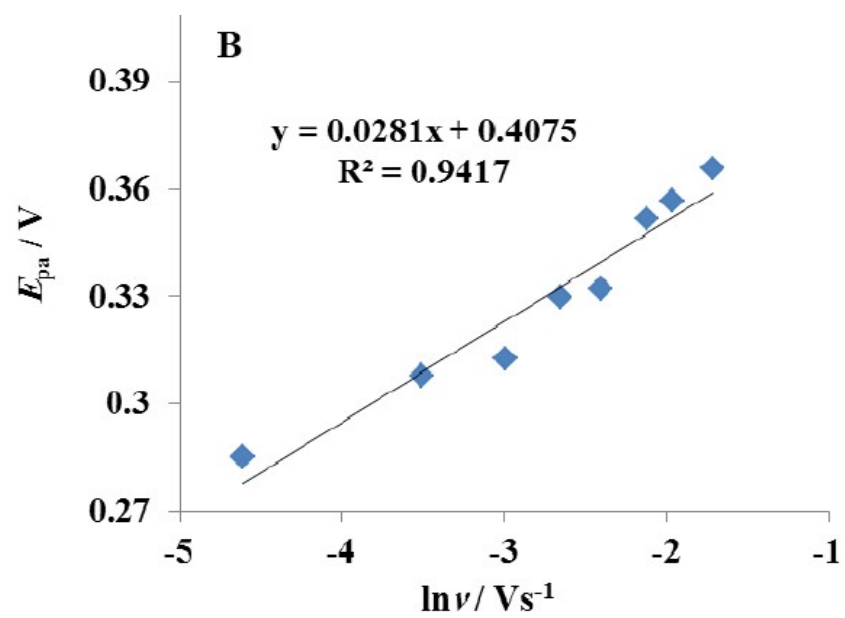

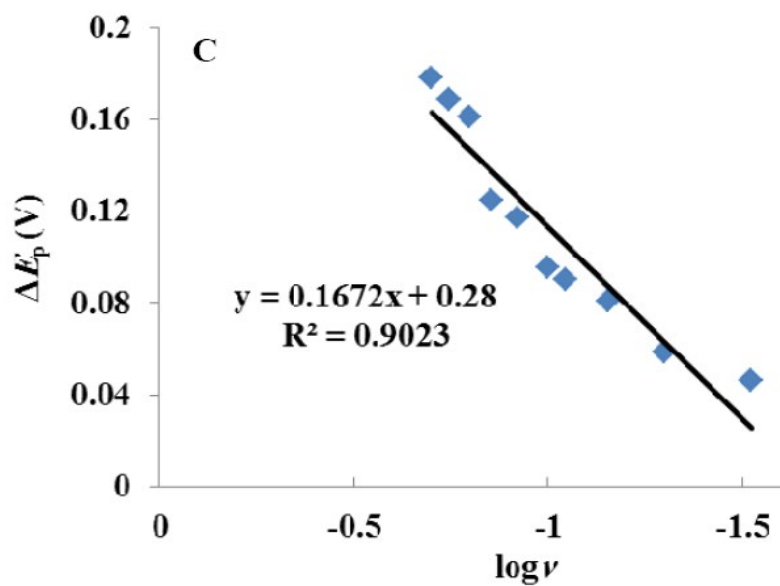

**Fig. S2.** (A) Tafel plot derived from the current potential curve recorded at scan rate  $0.01 \text{ V s}^{-1}$ .  
 (B) Dependence of anodic peak potential ( $E_{pa}$ ) to  $\ln \nu$ . (C) Dependence of the separation of peak potential ( $\Delta E_{pa}$ ) to the  $\log \nu$ .
